# Supplementary material for: Influence of the Multifunctional Biological Product Phytop 26.82 on the Growth and Development of Seed Potatoes
Source: Hindawi journal article supplement (doi:10.1155/2021/8879626), 2021-04-01
Supplement: f1 [file 8879626.f1.pdf]

**Table 1. Accounting date 4th week after planting potatoes**

| Accounting date 4 <sup>th</sup> week after planting potatoes (June 25, 2019) |              |                 |                 |                 |                            |            |            |            |            |            |                   |            |            |                    |                       |                   |
|------------------------------------------------------------------------------|--------------|-----------------|-----------------|-----------------|----------------------------|------------|------------|------------|------------|------------|-------------------|------------|------------|--------------------|-----------------------|-------------------|
| Experience variant                                                           | Weight, g    | Stem length, cm | Root length, cm | Number of stems | Damage to stems, in points |            |            |            |            |            | Number of stolons |            |            | Disease prevalence | Biological efficiency | Development index |
|                                                                              |              |                 |                 |                 | 0                          | 1          | 2          | 3          | 4          | 5          | total             | painful    | fallen     |                    |                       |                   |
| "Kemerovchanin" Control                                                      | 52           | 15,5            | 11              | 2               | 1                          | 1          | 0          | 0          | 0          | 0          | 8                 | 0          | 0          |                    |                       |                   |
|                                                                              | 79           | 19              | 9,7             | 2               | 2                          | 0          | 0          | 0          | 0          | 0          | 16                | 0          | 0          |                    |                       |                   |
|                                                                              | 137          | 18,3            | 12              | 3               | 2                          | 1          | 0          | 0          | 0          | 0          | 17                | 1          | 1          |                    |                       |                   |
| <b>Average by variant</b>                                                    | <b>89,3</b>  | <b>17,6</b>     | <b>10,9</b>     | <b>2,3</b>      | <b>1,7</b>                 | <b>0,7</b> | <b>0,0</b> | <b>0,0</b> | <b>0,0</b> | <b>0,0</b> | <b>13,7</b>       | <b>0,3</b> | <b>0,3</b> | <b>28,57</b>       |                       | <b>5,71</b>       |
| "Kemerovchanin" Phytop 26.82                                                 | 70           | 16              | 8               | 4               | 3                          | 1          | 0          | 0          | 0          | 0          | 13                | 2          | 0          |                    |                       |                   |
|                                                                              | 69           | 17              | 13,5            | 2               | 1                          | 1          | 0          | 0          | 0          | 0          | 11                | 0          | 0          |                    |                       |                   |
|                                                                              | 117          | 15              | 10,6            | 5               | 5                          | 0          | 0          | 0          | 0          | 0          | 24                | 0          | 0          |                    |                       |                   |
| <b>Average by variant</b>                                                    | <b>85,3</b>  | <b>16,0</b>     | <b>10,7</b>     | <b>3,7</b>      | <b>3,0</b>                 | <b>0,7</b> | <b>0,0</b> | <b>0,0</b> | <b>0,0</b> | <b>0,0</b> | <b>16,0</b>       | <b>0,7</b> | <b>0,0</b> | <b>18,18</b>       | <b>36,36</b>          | <b>3,64</b>       |
| "Kemerovchanin" Bactofit                                                     | 120          | 12,7            | 12,2            | 4               | 4                          | 0          | 0          | 0          | 0          | 0          | 20                | 0          | 0          |                    |                       |                   |
|                                                                              | 118          | 16,2            | 9,8             | 4               | 4                          | 0          | 0          | 0          | 0          | 0          | 21                | 0          | 1          |                    |                       |                   |
|                                                                              | 95           | 14,3            | 14              | 4               | 4                          | 0          | 0          | 0          | 0          | 0          | 20                | 0          | 0          |                    |                       |                   |
| <b>Average by variant</b>                                                    | <b>111,0</b> | <b>14,4</b>     | <b>12,0</b>     | <b>4,0</b>      | <b>4,0</b>                 | <b>0,0</b> | <b>0,0</b> | <b>0,0</b> | <b>0,0</b> | <b>0,0</b> | <b>20,3</b>       | <b>0,0</b> | <b>0,3</b> | <b>0,00</b>        | <b>100,00</b>         | <b>0,00</b>       |

**Table 2. Accounting date 6th week after planting potatoes**

| <b>Accounting date 6<sup>th</sup> week after planting potatoes (July 10, 2019)</b> |              |                 |                 |                 |                            |            |            |            |            |            |                   |            |            |                    |                       |                   |
|------------------------------------------------------------------------------------|--------------|-----------------|-----------------|-----------------|----------------------------|------------|------------|------------|------------|------------|-------------------|------------|------------|--------------------|-----------------------|-------------------|
| Experience variant                                                                 | Weight, g    | Stem length, cm | Root length, cm | Number of stems | Damage to stems, in points |            |            |            |            |            | Number of stolons |            |            | Disease prevalence | Biological efficiency | Development index |
|                                                                                    |              |                 |                 |                 | 0                          | 1          | 2          | 3          | 4          | 5          | total             | painful    | fallen     |                    |                       |                   |
| "Kemerovchanin" Control                                                            | 255          | 40              | 23              | 5               | 3                          | 2          | 0          | 0          | 0          | 0          | 17                | 0          | 5          |                    |                       |                   |
|                                                                                    | 190          | 40              | 20              | 4               | 4                          | 0          | 0          | 0          | 0          | 0          | 16                | 1          | 0          |                    |                       |                   |
|                                                                                    | 213          | 36              | 15              | 2               | 1                          | 1          | 0          | 0          | 0          | 0          | 10                | 0          | 0          |                    |                       |                   |
| <b>Average by variant</b>                                                          | <b>219,3</b> | <b>38,7</b>     | <b>19,3</b>     | <b>3,7</b>      | <b>2,7</b>                 | <b>1,0</b> | <b>0,0</b> | <b>0,0</b> | <b>0,0</b> | <b>0,0</b> | <b>14,3</b>       | <b>0,3</b> | <b>1,7</b> | <b>29,27</b>       |                       | <b>6,45</b>       |
| "Kemerovchanin" Phytop 26.82                                                       | 381          | 44              | 25              | 5               | 4                          | 0          | 1          | 0          | 0          | 0          | 19                | 0          | 0          |                    |                       |                   |
|                                                                                    | 337          | 42              | 21              | 5               | 4                          | 1          | 0          | 0          | 0          | 0          | 30                | 0          | 0          |                    |                       |                   |
|                                                                                    | 259          | 45              | 23              | 3               | 3                          | 0          | 0          | 0          | 0          | 0          | 20                | 0          | 0          |                    |                       |                   |
| <b>Average by variant</b>                                                          | <b>325,7</b> | <b>43,7</b>     | <b>23,0</b>     | <b>4,3</b>      | <b>3,7</b>                 | <b>0,3</b> | <b>0,3</b> | <b>0,0</b> | <b>0,0</b> | <b>0,0</b> | <b>23,0</b>       | <b>0,0</b> | <b>0,0</b> | <b>15,38</b>       | <b>28,44</b>          | <b>4,62</b>       |
| "Kemerovchanin" Bactofit                                                           | 223          | 35              | 14              | 6               | 6                          | 0          | 0          | 0          | 0          | 0          | 26                | 0          | 0          |                    |                       |                   |
|                                                                                    | 111          | 36              | 11              | 1               | 1                          | 0          | 0          | 0          | 0          | 0          | 25                | 0          | 0          |                    |                       |                   |
|                                                                                    | 206          | 39              | 25              | 5               | 5                          | 0          | 0          | 0          | 0          | 0          | 25                | 0          | 0          |                    |                       |                   |
| <b>Average by variant</b>                                                          | <b>180,0</b> | <b>36,7</b>     | <b>16,7</b>     | <b>4,0</b>      | <b>4,0</b>                 | <b>0,0</b> | <b>0,0</b> | <b>0,0</b> | <b>0,0</b> | <b>0,0</b> | <b>25,3</b>       | <b>0,0</b> | <b>0,0</b> | <b>0,00</b>        | <b>100,00</b>         | <b>0,00</b>       |

**Table 3. Accounting date 10th week after planting potatoes**

| Accounting date 10 <sup>th</sup> week after planting potatoes (August 7, 2019) |              |                 |                 |                 |                            |            |            |            |            |            |                   |            |            |                    |                       |                   |
|--------------------------------------------------------------------------------|--------------|-----------------|-----------------|-----------------|----------------------------|------------|------------|------------|------------|------------|-------------------|------------|------------|--------------------|-----------------------|-------------------|
| Experience variant                                                             | Weight, g    | Stem length, cm | Root length, cm | Number of stems | Damage to stems, in points |            |            |            |            |            | Number of stolons |            |            | Disease prevalence | Biological efficiency | Development index |
|                                                                                |              |                 |                 |                 | 0                          | 1          | 2          | 3          | 4          | 5          | total             | painful    | fallen     |                    |                       |                   |
| "Kemerovchanin" Control                                                        | 621          | 50              | 22              | 5               | 2                          | 1          | 1          | 0          | 0          | 1          | 36                | 5          | 4          |                    |                       |                   |
|                                                                                | 475          | 53              | 23              | 5               | 3                          | 1          | 0          | 1          | 0          | 0          | 31                | 5          | 3          |                    |                       |                   |
|                                                                                | 406          | 40              | 20              | 6               | 0                          | 0          | 0          | 1          | 4          | 1          | 27                | 5          | 8          |                    |                       |                   |
| <b>Average by variant</b>                                                      | <b>500,7</b> | <b>47,7</b>     | <b>21,7</b>     | <b>5,3</b>      | <b>1,7</b>                 | <b>0,7</b> | <b>0,3</b> | <b>0,7</b> | <b>1,3</b> | <b>0,7</b> | <b>31,3</b>       | <b>5,0</b> | <b>5,0</b> | <b>68,75</b>       |                       | <b>45,00</b>      |
| "Kemerovchanin" Phytop 26.82                                                   | 595          | 53              | 23              | 5               | 3                          | 1          | 1          | 0          | 0          | 0          | 34                | 2          | 1          |                    |                       |                   |
|                                                                                | 1077         | 63              | 24              | 5               | 1                          | 3          | 1          | 0          | 0          | 0          | 64                | 4          | 2          |                    |                       |                   |
|                                                                                | 1039         | 61              | 21              | 5               | 3                          | 2          | 0          | 0          | 0          | 0          | 46                | 3          | 0          |                    |                       |                   |
| <b>Average by variant</b>                                                      | <b>903,7</b> | <b>59,0</b>     | <b>22,7</b>     | <b>5,0</b>      | <b>2,3</b>                 | <b>2,0</b> | <b>0,7</b> | <b>0,0</b> | <b>0,0</b> | <b>0,0</b> | <b>48,0</b>       | <b>3,0</b> | <b>1,0</b> | <b>53,33</b>       | <b>70,37</b>          | <b>13,33</b>      |
| "Kemerovchanin" Bactofit                                                       | 583          | 62              | 22              | 4               | 2                          | 1          | 1          | 0          | 0          | 0          | 22                | 3          | 0          |                    |                       |                   |
|                                                                                | 635          | 59              | 22              | 4               | 2                          | 2          | 0          | 0          | 0          | 0          | 37                | 3          | 0          |                    |                       |                   |
|                                                                                | 866          | 56              | 30              | 5               | 3                          | 0          | 0          | 2          | 0          | 0          | 33                | 2          | 0          |                    |                       |                   |
| <b>Average by variant</b>                                                      | <b>694,7</b> | <b>59,0</b>     | <b>24,7</b>     | <b>4,3</b>      | <b>2,3</b>                 | <b>1,0</b> | <b>0,3</b> | <b>0,7</b> | <b>0,0</b> | <b>0,0</b> | <b>30,7</b>       | <b>2,7</b> | <b>0,0</b> | <b>46,15</b>       | <b>62,39</b>          | <b>16,92</b>      |

**Table 4. Data on the assessment of disease damage to potato tubers**

| Data on the assessment of disease damage to potato tubers ("Garden of Michurintsev", August 29, 2019) |                |              |                                               |                        |                         |                        |                    |               |                               |               |                                             |             |                |             |                |             |             |                                  |
|-------------------------------------------------------------------------------------------------------|----------------|--------------|-----------------------------------------------|------------------------|-------------------------|------------------------|--------------------|---------------|-------------------------------|---------------|---------------------------------------------|-------------|----------------|-------------|----------------|-------------|-------------|----------------------------------|
| Variety                                                                                               | Variants       | Replications | Number of plants before harvesting, specimens | Total number of tubers | Weight of all tubers, g | Healthy plants         |                    |               | Rhizoctonia                   |               |                                             |             |                |             |                |             | S.i.        | The prevalence of Rhizoctonia, % |
|                                                                                                       |                |              |                                               |                        |                         | The mass of 1 tuber, g | The quantity, pcs. | The weight, g | Net necrosis + charcoal spots |               | Tubers with single sclerotia + 1/10 surface |             | 1/4 surface    |             | 1/2 surface    |             |             |                                  |
|                                                                                                       |                |              |                                               |                        |                         |                        |                    |               | Quantity, pcs.                | Weight, g     | Quantity, pcs.                              | Weight, g   | Quantity, pcs. | Weight, g   | Quantity, pcs. | Weight, g   |             |                                  |
| Kemerovchanin                                                                                         | Control        | I            | 1                                             | 6                      | 591                     | 111,7                  | 7                  | 782           | 1                             | 84            | 0                                           | 0           | 0              | 0           | 0              | 0           | 0,10        | 0,0                              |
|                                                                                                       |                | II           | 1                                             | 7                      | 669                     | 89,5                   | 6                  | 537           | 1                             | 98            | 0                                           | 0           | 0              | 0           | 0              | 0           | 0,15        | 0,0                              |
|                                                                                                       |                | III          | 1                                             | 9                      | 1003                    | 93,3                   | 4                  | 373           | 3                             | 375           | 0                                           | 0           | 0              | 0           | 0              | 0           | 0,50        | 0,0                              |
| <b>Average</b>                                                                                        |                |              | <b>1,0</b>                                    | <b>7,33</b>            | <b>754,33</b>           | <b>98,15</b>           | <b>5,67</b>        | <b>564,00</b> | <b>1,67</b>                   | <b>185,67</b> | <b>0,00</b>                                 | <b>0,00</b> | <b>0,00</b>    | <b>0,00</b> | <b>0,00</b>    | <b>0,00</b> | <b>0,25</b> | <b>0,0</b>                       |
| Kemerovchanin                                                                                         | Bactofit       | I            | 1                                             | 8                      | 870                     | 73,6                   | 11                 | 810           | 1                             | 81            | 0                                           | 0           | 0              | 0           | 0              | 0           | 0,09        | 0,0                              |
|                                                                                                       |                | II           | 1                                             | 7                      | 637                     | 72,2                   | 10                 | 722           | 1                             | 79            | 0                                           | 0           | 0              | 0           | 0              | 0           | 0,10        | 0,0                              |
|                                                                                                       |                | III          | 1                                             | 8                      | 761                     | 60,1                   | 9                  | 541           | 2                             | 180           | 0                                           | 0           | 0              | 0           | 0              | 0           | 0,25        | 0,0                              |
| <b>Average</b>                                                                                        |                |              | <b>1,0</b>                                    | <b>7,67</b>            | <b>756,00</b>           | <b>68,65</b>           | <b>10,00</b>       | <b>691,00</b> | <b>1,33</b>                   | <b>113,33</b> | <b>0,00</b>                                 | <b>0,00</b> | <b>0,00</b>    | <b>0,00</b> | <b>0,00</b>    | <b>0,00</b> | <b>0,15</b> | <b>0,0</b>                       |
| Kemerovchanin                                                                                         | Phytotop 26.82 | I            | 1                                             | 12                     | 821                     | 98,5                   | 6                  | 591           | 0                             | 0             | 0                                           | 0           | 0              | 0           | 0              | 0           | 0,00        | 0,0                              |
|                                                                                                       |                | II           | 1                                             | 12                     | 844                     | 76,0                   | 5                  | 380           | 2                             | 288           | 0                                           | 0           | 0              | 0           | 0              | 0           | 0,43        | 0,0                              |
|                                                                                                       |                | III          | 1                                             | 13                     | 854                     | 78,1                   | 9                  | 703           | 0                             | 0             | 0                                           | 0           | 0              | 0           | 0              | 0           | 0,00        | 0,0                              |
| <b>Average</b>                                                                                        |                |              | <b>1,0</b>                                    | <b>12,33</b>           | <b>839,67</b>           | <b>84,20</b>           | <b>6,67</b>        | <b>558,00</b> | <b>0,67</b>                   | <b>96,00</b>  | <b>0,00</b>                                 | <b>0,00</b> | <b>0,00</b>    | <b>0,00</b> | <b>0</b>       | <b>0</b>    | <b>0,14</b> | <b>0,0</b>                       |

**Table 5. Fractional composition of potato tubers harvest**

| Fractional composition of potato tubers harvest ("Garden of Michurintsev", August 29, 2019) |              |            |                                               |                                                  |                         |                            |                        |                     |                            |                        |                     |                            |                        |                     |                    |              |              |              |                               |                      |                      |
|---------------------------------------------------------------------------------------------|--------------|------------|-----------------------------------------------|--------------------------------------------------|-------------------------|----------------------------|------------------------|---------------------|----------------------------|------------------------|---------------------|----------------------------|------------------------|---------------------|--------------------|--------------|--------------|--------------|-------------------------------|----------------------|----------------------|
| Variety                                                                                     | Variant      | Repetition | Number of plants before harvesting, specimens | The number of tubers in the sample (from 1 bush) | Weight of all tubers, g | Fraction weight, g         |                        |                     |                            |                        |                     |                            |                        |                     | Fraction weight, % |              |              | The harvest  |                               |                      |                      |
|                                                                                             |              |            |                                               |                                                  |                         | small                      |                        |                     | medium                     |                        |                     | large                      |                        |                     | small              | medium       | large        | verification | tonne/ha                      |                      |                      |
|                                                                                             |              |            |                                               |                                                  |                         | the number of tubers, pcs. | the mass of all tubers | the mass of 1 tuber | the number of tubers, pcs. | the mass of all tubers | the mass of 1 tuber | the number of tubers, pcs. | the mass of all tubers | the mass of 1 tuber |                    |              |              |              | Harvest weight from 1 bush, g | 4 bushes per 1 sq. m | 6 bushes per 1 sq. m |
| Kemerovchanin                                                                               | Control      | I          | 1                                             | 6                                                | 591                     | 0                          | 0                      | 0,0                 | 6                          | 591                    | 98,5                | 0                          | 0                      | 0,0                 | 0,00               | 100,00       | 0,00         |              | 591,0                         | 23,6                 | 35,5                 |
|                                                                                             |              | II         | 1                                             | 7                                                | 669                     | 0                          | 0                      | 0,0                 | 5                          | 334                    | 66,8                | 2                          | 335                    | 167,5               | 0,00               | 49,93        | 50,07        |              | 669,0                         | 26,8                 | 40,1                 |
|                                                                                             |              | III        | 1                                             | 9                                                | 1003                    | 2                          | 61                     | 30,5                | 5                          | 378                    | 75,6                | 2                          | 564                    | 282,0               | 6,08               | 37,69        | 56,23        |              | 1003,0                        | 40,1                 | 60,2                 |
| <b>Average</b>                                                                              |              |            | 1                                             | <b>7,3</b>                                       | <b>754,3</b>            | <b>0,7</b>                 | <b>20,3</b>            | <b>10,2</b>         | <b>5,3</b>                 | <b>434,3</b>           | <b>80,3</b>         | <b>1,3</b>                 | <b>299,7</b>           | <b>149,8</b>        | <b>2,03</b>        | <b>62,54</b> | <b>35,44</b> | <b>0,0</b>   | <b>754,3</b>                  | <b>30,2</b>          | <b>45,3</b>          |
| Kemerovchanin                                                                               | Bactofit     | I          | 1                                             | 8                                                | 870                     | 0                          | 0                      | 0,0                 | 4                          | 262                    | 65,5                | 4                          | 608                    | 152,0               | 0,00               | 30,11        | 69,89        |              | 870,0                         | 34,8                 | 52,2                 |
|                                                                                             |              | II         | 1                                             | 7                                                | 637                     | 2                          | 42                     | 21,0                | 3                          | 248                    | 82,7                | 2                          | 347                    | 173,5               | 6,59               | 38,93        | 54,47        |              | 637,0                         | 25,5                 | 38,2                 |
|                                                                                             |              | III        | 1                                             | 8                                                | 761                     | 1                          | 33                     | 33,0                | 5                          | 399                    | 79,8                | 2                          | 329                    | 164,5               | 4,34               | 52,43        | 43,23        |              | 761,0                         | 30,4                 | 45,7                 |
| <b>Average</b>                                                                              |              |            | 1                                             | <b>7,7</b>                                       | <b>756,0</b>            | <b>1,0</b>                 | <b>25,0</b>            | <b>18,0</b>         | <b>4,0</b>                 | <b>303,0</b>           | <b>76,0</b>         | <b>2,7</b>                 | <b>428,0</b>           | <b>163,3</b>        | <b>3,64</b>        | <b>40,49</b> | <b>55,86</b> | <b>0,0</b>   | <b>756,0</b>                  | <b>30,2</b>          | <b>45,4</b>          |
| Kemerovchanin                                                                               | Phytop 26.82 | I          | 1                                             | 12                                               | 821                     | 2                          | 42                     | 21,0                | 7                          | 414                    | 59,1                | 3                          | 365                    | 121,7               | 5,12               | 50,43        | 44,46        |              | 821,0                         | 32,8                 | 49,3                 |
|                                                                                             |              | II         | 1                                             | 12                                               | 844                     | 3                          | 43                     | 14,3                | 8                          | 651                    | 81,4                | 1                          | 150                    | 150,0               | 5,09               | 77,13        | 17,77        |              | 844,0                         | 33,8                 | 50,6                 |
|                                                                                             |              | III        | 1                                             | 13                                               | 854                     | 2                          | 21                     | 10,5                | 11                         | 833                    | 75,7                | 0                          | 0                      | 0,0                 | 2,46               | 97,54        | 0,00         |              | 854,0                         | 34,2                 | 51,2                 |
| <b>Average</b>                                                                              |              |            | 1                                             | <b>12,3</b>                                      | <b>839,7</b>            | <b>2,3</b>                 | <b>35,3</b>            | <b>15,3</b>         | <b>8,7</b>                 | <b>632,7</b>           | <b>72,1</b>         | <b>1,3</b>                 | <b>171,7</b>           | <b>90,6</b>         | <b>4,22</b>        | <b>75,03</b> | <b>20,74</b> | <b>0,0</b>   | <b>839,7</b>                  | <b>33,6</b>          | <b>50,4</b>          |
